# Supplementary material for: Promising Bioregulators for Higher Water Productivity and Oil Quality of Chia under Deficit Irrigation in Semiarid Regions
Source: MDPI journal article supplement (doi:10.3390/plants12030662), 2023-02-02
Supplement: s1 [file s1]

**Table S1**

Interaction effect of irrigation regimes and bio-regulators on yield attributes of chia

| Treatments                      | Number of spikes per plant | Spike length (cm) | 1000 seed weight (g) | Oil content (%) | Harvest index |
|---------------------------------|----------------------------|-------------------|----------------------|-----------------|---------------|
| Interaction effect of I and BRs |                            |                   |                      |                 |               |
| I <sub>25</sub> –Control        | 15.26 l                    | 10.87 h           | 1.12 k               | 30.86 l         | 14.26h        |
| I <sub>25</sub> –KO             | 15.10 l                    | 10.16 h           | 1.13 k               | 31.00 kl        | 14.33h        |
| I <sub>25</sub> –SA             | 20.72 h–j                  | 17.13 d–f         | 1.14 g–k             | 31.65 h–j       | 11.48jk       |
| I <sub>25</sub> –PS             | 17.62 k                    | 12.03 h           | 1.13 jk              | 31.38 jk        | 12.84i        |
| I <sub>25</sub> –SB             | 17.66 k                    | 11.99 h           | 1.13 k               | 31.44 i–k       | 12.31ij       |
| I <sub>25</sub> –TU             | 21.98 g–i                  | 17.77 c–f         | 1.14 h–k             | 31.80 g–h       | 10.48k        |
| I <sub>25</sub> –KN             | 22.34 f–h                  | 17.95 c–e         | 1.14 i–k             | 31.62 i–h       | 10.78 k       |
| I <sub>50</sub> –Control        | 18.63 k                    | 12.69 gh          | 1.16 g–k             | 31.51 h–j       | 19.33 b–d     |
| I <sub>50</sub> –KO             | 19.05 jk                   | 12.15 h           | 1.17 e–i             | 31.53 ij        | 19.37 b–d     |
| I <sub>50</sub> –SA             | 21.84 g–i                  | 18.66 b–e         | 1.17 e–g             | 32.00 h–j       | 19.45 b–d     |
| I <sub>50</sub> –PS             | 20.47 ij                   | 15.40 fg          | 1.16 f–j             | 32.10 f–i       | 18.87 cd      |
| I <sub>50</sub> – SB            | 20.40 ij                   | 16.32 ef          | 1.16 g–k             | 32.00 f–h       | 19.30 b–d     |
| I <sub>50</sub> – TU            | 22.96 d–g                  | 19.28 a–d         | 1.17 e–h             | 32.23 e–g       | 18.37d–f      |
| I <sub>50</sub> – KN            | 23.86 b–f                  | 19.47 a–d         | 1.17 e–i             | 32.28 d–g       | 18.50 de      |
| I <sub>75</sub> – Control       | 22.80 d–g                  | 17.17 d–f         | 1.19 d–f             | 32.32 c–f       | 20.40 ab      |
| I <sub>75</sub> – KO            | 22.46 e–g                  | 16.93 d–f         | 1.19 d–f             | 32.24 e–g       | 20.88 a       |
| I <sub>75</sub> – SA            | 23.36 c–g                  | 20.40 a–c         | 1.21 a–d             | 32.69 a–d       | 20.38 ab      |
| I <sub>75</sub> –PS             | 23.41 c–g                  | 18.84 a–e         | 1.19 c–f             | 32.52 b–e       | 19.81 a–c     |
| I <sub>75</sub> –SB             | 23.10 d–g                  | 18.70 a–e         | 1.20 b–e             | 32.65 a–e       | 20.13 ab      |
| I <sub>75</sub> –TU             | 24.30 a–d                  | 20.04 a–c         | 1.21 a–d             | 32.89 ab        | 19.93a–c      |
| I <sub>75</sub> – KN            | 25.05 a–c                  | 20.98 ab          | 1.22 a–d             | 32.80 a–c       | 19.88 a–c     |
| I <sub>100</sub> – Control      | 24.10 b–e                  | 19.57 a–d         | 1.22 ab              | 32.69 a–e       | 17.25 fg      |
| I <sub>100</sub> – KO           | 24.27 a–d                  | 19.22 a–d         | 1.22 ab              | 32.70 a–e       | 17.30 fg      |
| I <sub>100</sub> – SA           | 24.98 a–c                  | 21.49 a           | 1.23 ab              | 32.95 a–d       | 17.34 e–g     |
| I <sub>100</sub> – PS           | 24.44 a–d                  | 19.63 a–d         | 1.23 ab              | 32.98 ab        | 17.28fg       |
| I <sub>100</sub> – SB           | 24.34 a–d                  | 19.14 a–d         | 1.22 ab              | 32.96 ab        | 17.12g        |
| I <sub>100</sub> –TU            | 25.28 ab                   | 20.81 ab          | 1.23 ab              | 33.07 a         | 17.18g        |
| I <sub>100</sub> – KN           | 25.89 a                    | 21.14 ab          | 1.24 a               | 33.01 a         | 17.01g        |
| P value                         | <.0001                     | <.0001            | 0.891                | 0.191           | <.0001        |
| Year                            |                            |                   |                      |                 |               |
| 2020–21                         | 21.9a                      | 17.11b            | 1.19a                | 31.77b          | 16.91b        |
| 2021–22                         | 22.0a                      | 17.52a            | 1.17b                | 32.64a          | 17.49a        |
| P value                         | 0.810                      | 0.035             | <.0001               | <.0001          | <.0001        |

KO, SA, PS, SB, TU, KN and no PBR denote Kaolin, salicylic acid, Potassium silicate, sodium benzoate, thiourea, potassium nitrate and control, respectively. Y, B, I denotes year, bio regulators and Irrigation respectively. I<sub>25</sub>, I<sub>50</sub>, I<sub>75</sub> and I<sub>100</sub> denotes irrigation regimes at 25, 50, 75 and 100 %

CPE respectively. Means followed by the same letter, (s) within a column are not significantly differed.

**Table S2**

Interaction effect of irrigation regimes and bio-regulators on fatty acid composition of chia oil

Interaction effect of irrigation regimes and bio-regulators on yield attributes of chia

| Treatments/<br>Fatty acids | Palmitic<br>acid (%) | Stearic<br>acid (%) | Oleic<br>acid (%) | Linoleic<br>acid (%) | Linolenic<br>acid (%) |
|----------------------------|----------------------|---------------------|-------------------|----------------------|-----------------------|
| Interaction effect         |                      |                     |                   |                      |                       |
| I <sub>25</sub> –Control   | 10.21a               | 6.838 a             | 9.43 a            | 22.28 m              | 51.22 n               |
| I <sub>25</sub> –KO        | 10.18ab              | 6.732 ab            | 9.28 a            | 22.38 m              | 51.41 mn              |
| I <sub>25</sub> –SA        | 9.94a–d              | 5.902 de            | 9.02 b            | 23.24 j              | 51.87 j–l             |
| I <sub>25</sub> –PS        | 9.89a–e              | 6.352 c             | 9.35 a            | 22.97 kl             | 51.42 mn              |
| I <sub>25</sub> –SB        | 9.86 a–f             | 6.478 bc            | 9.10 b            | 22.85 l              | 51.69 lm              |
| I <sub>25</sub> –TU        | 9.58 d–i             | 5.760 d–f           | 8.96 b            | 23.34 ij             | 52.13 h–k             |
| I <sub>25</sub> –KN        | 9.77a–g              | 5.668 d–f           | 8.98 b            | 23.27 ij             | 52.28 hi              |
| I <sub>50</sub> –Control   | 10.20a               | 5.960 d             | 9.35 a            | 23.01 kl             | 51.46 mn              |
| I <sub>50</sub> –KO        | 10.12ab              | 5.892 de            | 8.97              | 23.15 jk             | 51.76 k–m             |
| I <sub>50</sub> –SA        | 9.32 g–j             | 5.780 de            | 8.77 cd           | 23.62 h              | 52.51 f–h             |
| I <sub>50</sub> –PS        | 9.73 a–h             | 5.940 de            | 8.98 b            | 23.31 ij             | 52.01 i–l             |
| I <sub>50</sub> – SB       | 9.92 a–d             | 5.870 de            | 8.77 c            | 23.16 jk             | 52.25 h–j             |
| I <sub>50</sub> – TU       | 9.65 d–i             | 5.192 gh            | 8.63 c–f          | 23.58 hi             | 52.92 e               |
| I <sub>50</sub> – KN       | 9.65 d–i             | 4.922 h–k           | 8.69 c–e          | 23.91 g              | 52.81 e–g             |
| I <sub>75</sub> – Control  | 9.95a–d              | 5.460 fg            | 8.96 b            | 23.47 h              | 52.13 h–k             |
| I <sub>75</sub> – KO       | 9.69 b–i             | 5.640 ef            | 8.73 cd           | 23.67 h              | 52.24 h–j             |
| I <sub>75</sub> – SA       | 9.24 h–j             | 4.842 i–l           | 8.49 f–h          | 24.40 bc             | 52.91 e               |
| I <sub>75</sub> –PS        | 9.75 a–g             | 4.992 h–j           | 8.76 cd           | 24.05 fg             | 52.43 gh              |
| I <sub>75</sub> –SB        | 9.60 d–i             | 5.120 hi            | 8.60 d–f          | 23.90 g              | 52.76 e–g             |
| I <sub>75</sub> –TU        | 9.41 d–i             | 4.582 l–n           | 8.49 f–h          | 24.13 d–f            | 53.37 cd              |
| I <sub>75</sub> – KN       | 9.37 f–j             | 4.483 mn            | 8.36 hi           | 24.22 c–f            | 53.55 bc              |
| I <sub>100</sub> – Control | 9.64 d–i             | 4.790 j–l           | 8.70 c–e          | 24.07 e–g            | 52.77 e–g             |
| I <sub>100</sub> – KO      | 9.40 e–j             | 5.202 gh            | 8.42 g–i          | 24.10 e–g            | 52.85 ef              |
| I <sub>100</sub> – SA      | 8.95 h–j             | 4.612 l–n           | 7.91 l            | 24.62 a              | 53.91 b               |
| I <sub>100</sub> – PS      | 9.22 ij              | 4.602 l–n           | 8.55 e–g          | 24.50 ab             | 53.14 de              |
| I <sub>100</sub> – SB      | 9.65 c–h             | 4.640 k–n           | 8.29 ij           | 24.34 b–d            | 53.04 de              |
| I <sub>100</sub> –TU       | 8.05 k               | 4.730 j–m           | 8.13 jk           | 24.27 c–e            | 54.79 a               |
| I <sub>100</sub> – KN      | 8.10 k               | 4.380 n             | 8.04 kl           | 24.63 a              | 54.85 a               |
| P value                    | <.0001               | <.0001              | <.0001            | <.0001               | <.0001                |
| Year                       |                      |                     |                   |                      |                       |
| 2020–21                    | 9.55a                | 5.39a               | 8.73b             | 23.62b               | 52.50b                |
| 2021–22                    | 9.59a                | 5.41a               | 8.76a             | 23.70a               | 52.67a                |
| P value                    | 0.364                | 0.382               | 0.012             | <.0001               | <.0001                |

KO, SA, PS, SB, TU, KN and no PBR denote Kaolin, salicylic acid, Potassium silicate, sodium benzoate, thiourea, potassium nitrate and control, respectively. Y, B, I denotes year, bio regulators and Irrigation respectively. I25, I50, I75 and I100 denotes irrigation regimes at 25, 50, 75 and 100 % CPE respectively. Means followed by the same letter, (s) within a column are not significantly differed.
